# Supplementary material
Source: Springer Nature journal article supplement (https://www.springermedizin.de/resource/supplementary/12889_2014_7291_MOESM2_ESM.pdf/9499582)
Supplement: MOESM2 [file 9499582]

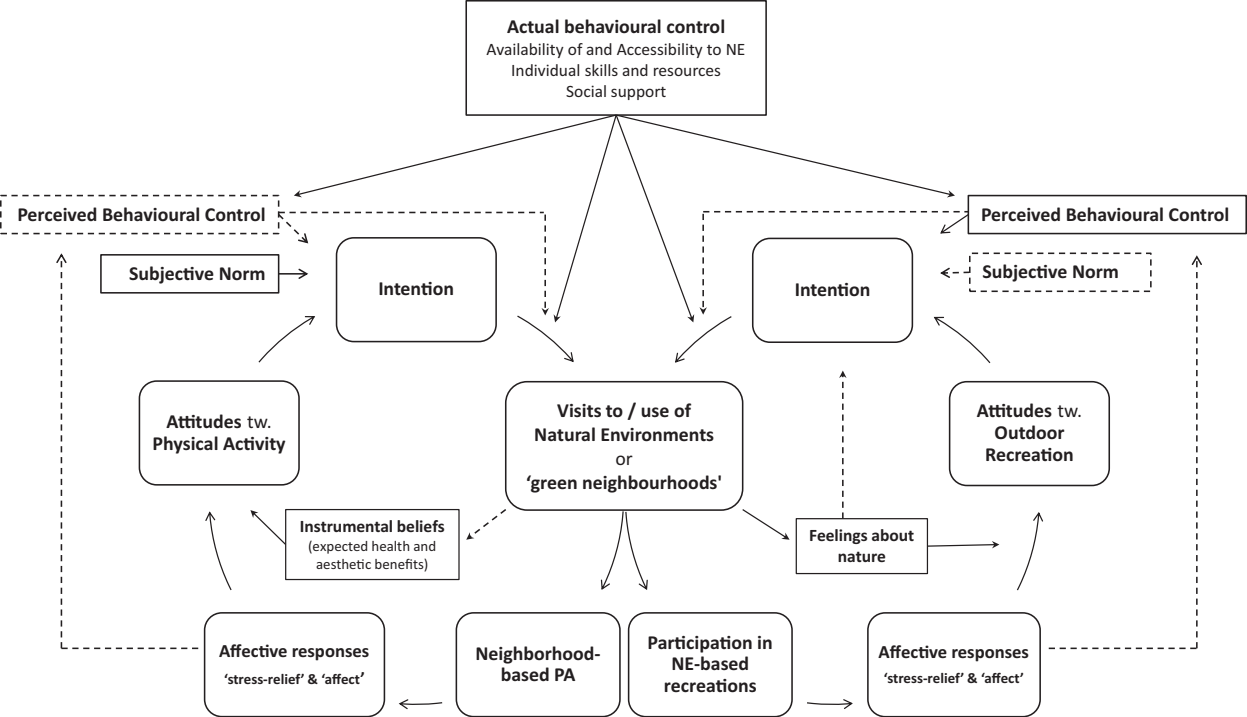

**Contribution of NE to 'active living'**  
Environmental planning and interventions

**'Active use' of the natural environment**  
Programing of NE-based activities and recreations
